# Supplementary material for: Proteomic Analysis of Barley (Hordeum vulgare L.) Leaves in Response to Date Palm Waste Compost Application
Source: MDPI journal article supplement (doi:10.3390/plants11233287), 2022-11-29
Supplement: s1 [file s1]

**Supplemental Figure S1.** Morphological effects of date palm waste compost on shoots and roots of barley plants.

**Supplemental Figure S2.** Correlation coefficient ( $R^2$ ) of the fold changes between qRT-PCR and LC-MS/MS values.

Control      Compost

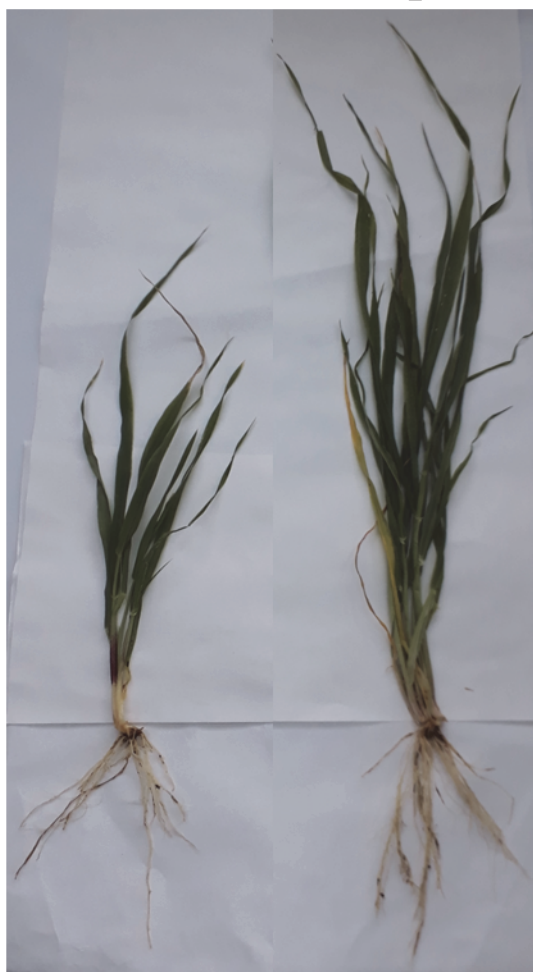

**Supplemental Figure S1** Morphological effects of date palm waste compost on shoots and roots of barley plants.

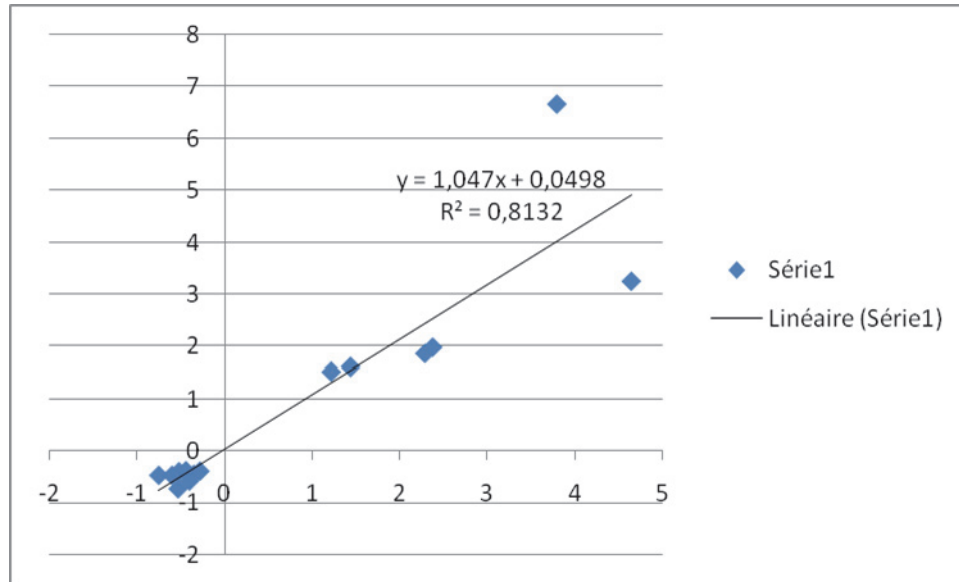

**Supplemental Figure S2** Correlation coefficient ( $R^2$ ) of the fold changes between qRT-PCR and LC-MS/MS values
